# Supplementary material
Source: ML conference proceedings conference paper supplement (https://proceedings.neurips.cc/paper_files/paper/2016/hash/06409663226af2f3114485aa4e0a23b4-Abstract.html)
Supplement: Supplementary file 2 [file 06409663226af2f3114485aa4e0a23b4-Supplemental.zip]

Archive with 1 entries (1 files):
- supplement.pdf
